# Supplementary material for: Comparative Flavor Profile of Roasted Germinated Wheat (Triticum aestivum L.) Beverages Served Hot and Cold Using Electronic Sensors Combined with Chemometric Statistical Analysis
Source: MDPI journal article supplement (doi:10.3390/foods11193099), 2022-10-05
Supplement: s1 [file s1]

**Table S1.** Physical and nutraceutical characteristics of hot and cold wheat beverages.

| Characteristics          |                     | Hot beverages           |                          |                         | Cold beverages          |                           |                           |
|--------------------------|---------------------|-------------------------|--------------------------|-------------------------|-------------------------|---------------------------|---------------------------|
|                          |                     | HB_1                    | HB_2                     | HB_3                    | CB_1                    | CB_2                      | CB_3                      |
| Physical characteristics | Solid content (%)   | 0.11±0.004 <sup>b</sup> | 0.17±0.016 <sup>a</sup>  | 0.16±0.003 <sup>a</sup> | 0.06±0.002 <sup>c</sup> | 0.11±0.002 <sup>B</sup>   | 0.14±0.002 <sup>A</sup>   |
|                          | Yield (%)           | 0.11±0.013 <sup>b</sup> | 0.23±0.011 <sup>a</sup>  | 0.22±0.005 <sup>a</sup> | 0.09±0.011 <sup>B</sup> | 0.20±0.025 <sup>A</sup>   | 0.24±0.024 <sup>A</sup>   |
| Color characteristics    | L*                  | 90.86±0.09 <sup>a</sup> | 87.95±0.64 <sup>b</sup>  | 87.18±1.27 <sup>b</sup> | 90.21±0.01 <sup>A</sup> | 85.99±0.09 <sup>B</sup>   | 85.08±0.01 <sup>C</sup>   |
|                          | a*                  | -0.78±0.01 <sup>c</sup> | -0.66±0.04 <sup>b</sup>  | -0.49±0.06 <sup>a</sup> | -1.16±0.01 <sup>C</sup> | -0.58±0.01 <sup>B</sup>   | -0.05±0.01 <sup>A</sup>   |
|                          | b*                  | 6.79±0.31 <sup>b</sup>  | 11.18±1.26 <sup>a</sup>  | 10.76±1.38 <sup>a</sup> | 14.45±0.02 <sup>C</sup> | 26.58±0.03 <sup>B</sup>   | 29.71±0.04 <sup>A</sup>   |
|                          | ΔE                  | 11.43±0.25 <sup>b</sup> | 16.48±1.31 <sup>a</sup>  | 16.76±1.84 <sup>a</sup> | 17.51±0.02 <sup>C</sup> | 30.06±0.06 <sup>B</sup>   | 33.26±0.03 <sup>A</sup>   |
|                          | BI                  | 0.08±0.01 <sup>b</sup>  | 0.12±0.01 <sup>a</sup>   | 0.11±0.00 <sup>a</sup>  | 0.21±0.00 <sup>C</sup>  | 0.36±0.00 <sup>B</sup>    | 0.46±0.00 <sup>A</sup>    |
| Bioactive components     | TFC (μg CE/100 mL)  | 3.87±0.30 <sup>c</sup>  | 11.52±0.58 <sup>a</sup>  | 8.60±0.60 <sup>b</sup>  | 10.86±0.47 <sup>B</sup> | 25.34±1.39 <sup>A</sup>   | 32.31±1.13 <sup>A</sup>   |
|                          | TPC (μg GAE/100 mL) | 28.05±3.03 <sup>b</sup> | 71.23±11.06 <sup>a</sup> | 54.47±9.39 <sup>a</sup> | 58.25±4.43 <sup>C</sup> | 160.42±19.10 <sup>B</sup> | 202.37±20.94 <sup>A</sup> |
| Antioxidant properties   | DPPH (μM TE/100 mL) | 6.15±1.70 <sup>c</sup>  | 20.39±1.39 <sup>a</sup>  | 13.12±1.08 <sup>b</sup> | 19.56±0.87 <sup>C</sup> | 47.25±0.62 <sup>B</sup>   | 68.43±3.41 <sup>A</sup>   |
|                          | TEAC (mM TE/100 mL) | 11.41±0.96 <sup>c</sup> | 31.77±1.96 <sup>a</sup>  | 23.94±1.29 <sup>b</sup> | 34.15±1.54 <sup>C</sup> | 86.12±4.50 <sup>B</sup>   | 126.66±4.00 <sup>A</sup>  |

TFC, total flavonoid content; TPC, total phenolic content; DPPH, radical scavenging activity; TEAC, trolox equivalent antioxidant capacity; L\*, lightness; a\*, redness; b\*, yellowness; HB\_1, hot beverage 0.8 g/100 mL; HB\_2, hot beverage 2 g/100 mL; HB\_3, hot beverage 4 g/100 mL; CB\_1, cold beverage 25 g/L; CB\_2, cold beverage 50 g/L; CB\_3, cold beverage 75 g/L; CE, catechin equivalent, GAE, gallic acid equivalent; TE, trolox equivalent. The different small letters indicate significant difference between hot beverages and the different capital letters indicates significant difference between cold beverages ( $p < 0.05$ ).

**Table S2.** Taste properties of germinated wheat beverages (GWB) by e-tongue.

| Taste properties | Hot-brewed beverages   |                        |                        | Cold-brewed beverages  |                        |                        |
|------------------|------------------------|------------------------|------------------------|------------------------|------------------------|------------------------|
|                  | HB_1                   | HB_2                   | HB_3                   | CB_1                   | CB_2                   | CB_3                   |
| SRS_Sourness     | 5.87±0.05 <sup>c</sup> | 4.23±0.05 <sup>b</sup> | 6.10±0.08 <sup>a</sup> | 3.07±0.12 <sup>C</sup> | 7.67±0.05 <sup>B</sup> | 9.03±0.05 <sup>A</sup> |
| STS_Saltiness    | 6.47±0.05 <sup>b</sup> | 8.00±0.08 <sup>b</sup> | 6.30±0.08 <sup>a</sup> | 8.37±0.05 <sup>A</sup> | 4.27±0.05 <sup>B</sup> | 2.67±0.05 <sup>C</sup> |
| UMS_Umami        | 3.77±0.19 <sup>c</sup> | 4.17±0.09 <sup>b</sup> | 4.53±0.05 <sup>a</sup> | 6.47±0.05 <sup>C</sup> | 8.07±0.05 <sup>B</sup> | 9.00±0.00 <sup>A</sup> |
| SWS_Sweetness    | 3.90±1.28 <sup>b</sup> | 6.90±0.86 <sup>a</sup> | 6.80±0.37 <sup>a</sup> | 9.10±0.28 <sup>A</sup> | 5.23±0.66 <sup>B</sup> | 4.03±1.07 <sup>B</sup> |
| BRS_Bitterness   | 6.43±0.19 <sup>b</sup> | 7.83±0.05 <sup>a</sup> | 6.27±0.05 <sup>b</sup> | 8.43±0.17 <sup>A</sup> | 4.47±0.05 <sup>B</sup> | 2.53±0.05 <sup>C</sup> |

HB\_1, hot beverage 0.8 g/100 mL; HB\_2, hot beverage 2 g/100 mL; HB\_3, hot beverage 4 g/100 mL; CB\_1, cold beverage 25 g/L; CB\_2, cold beverage 50 g/L; CB\_3, cold beverage 75 g/L. Values are expressed means of three replications ± SD. The different small letters indicate significant difference between hot beverages and the different capital letters indicates significant difference between cold beverages ( $p < 0.05$ ).
